# Supplementary material
Source: publisher figshare collection journal article supplement (https://acs.figshare.com/ndownloader/files/4380652)
Supplement: Supplementary file 1 [file 4380652]

## **Supplementary Information**

### **Improved Speciation Characteristics of PEGylated Indocyanine Green-Labeled Panitumumab: Revisiting the Solution and Spectroscopic Properties of a Near-Infrared Emitting anti-HER1 Antibody for Optical Imaging of Cancer**

Aaron Joseph L. Villaraza, Diane E. Milenic, and Martin W. Brechbiel

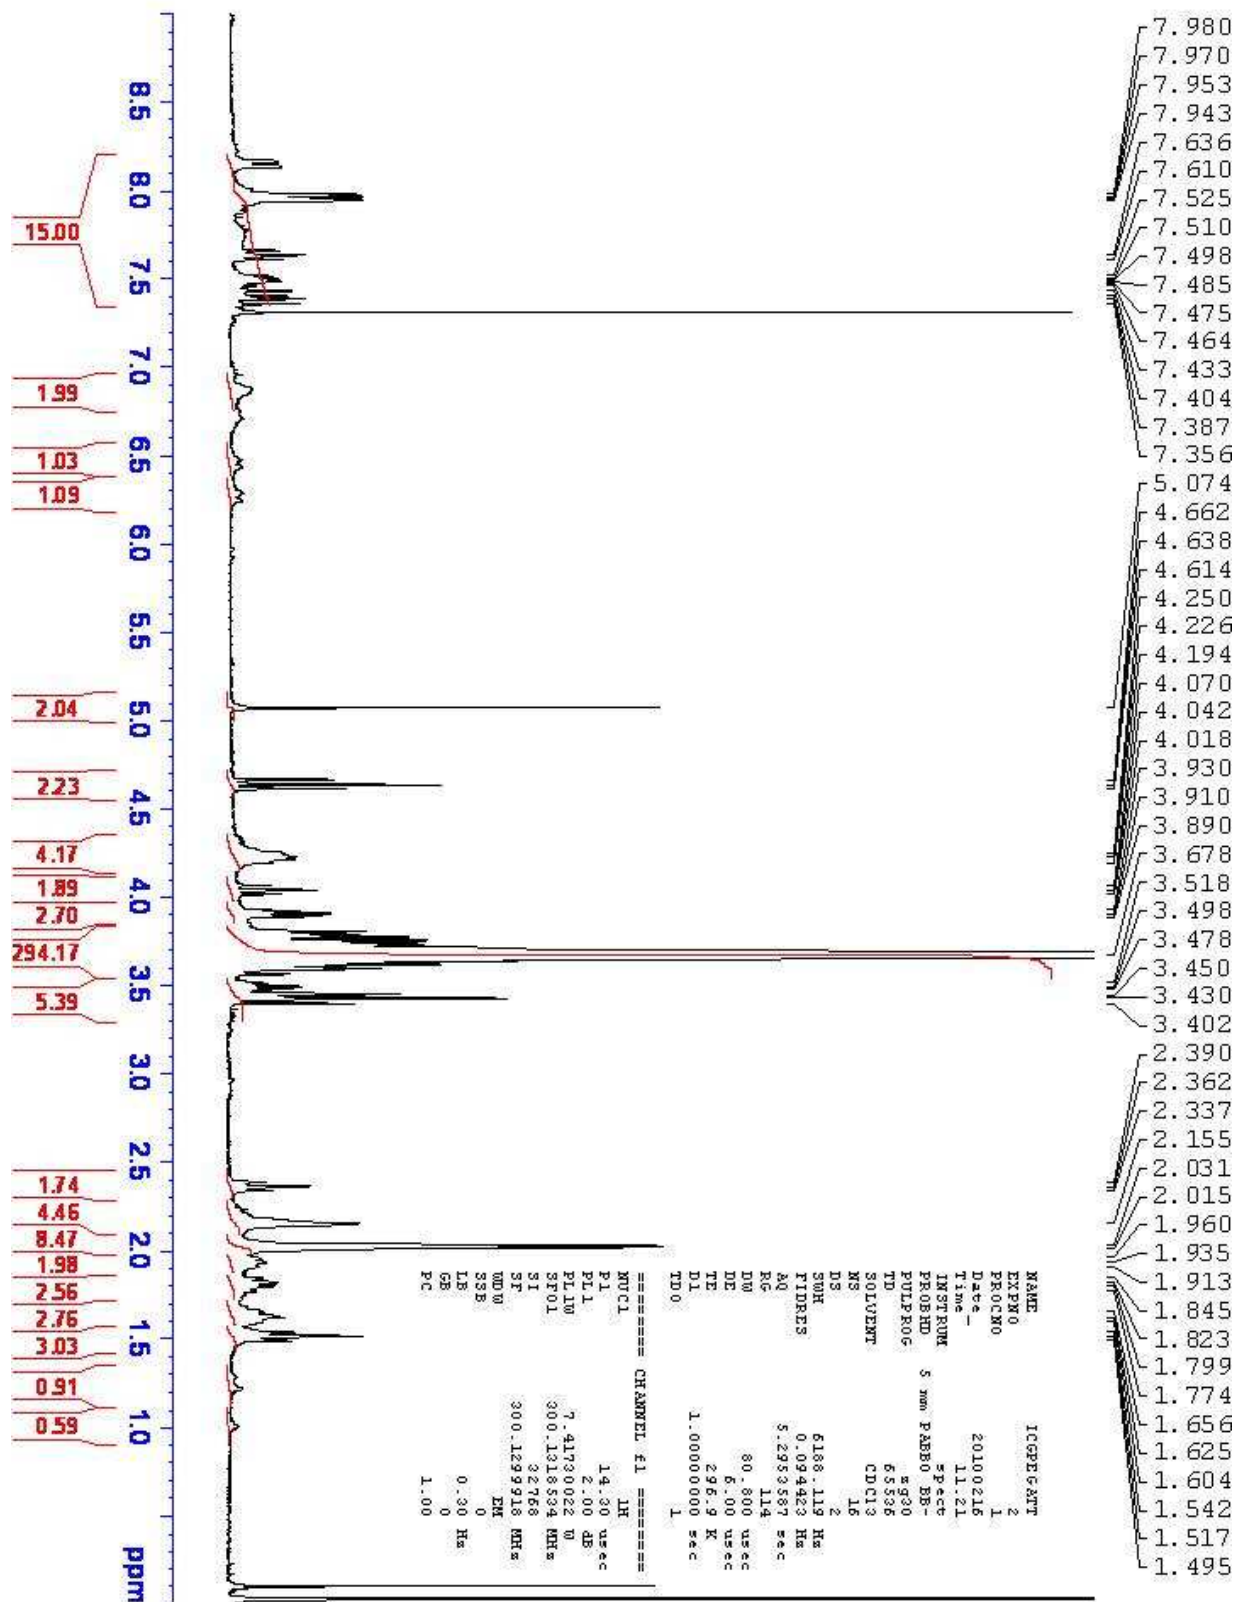

Supplementary Figure 1.  $^1\text{H}$  NMR spectrum of PEGylated ICG (4).

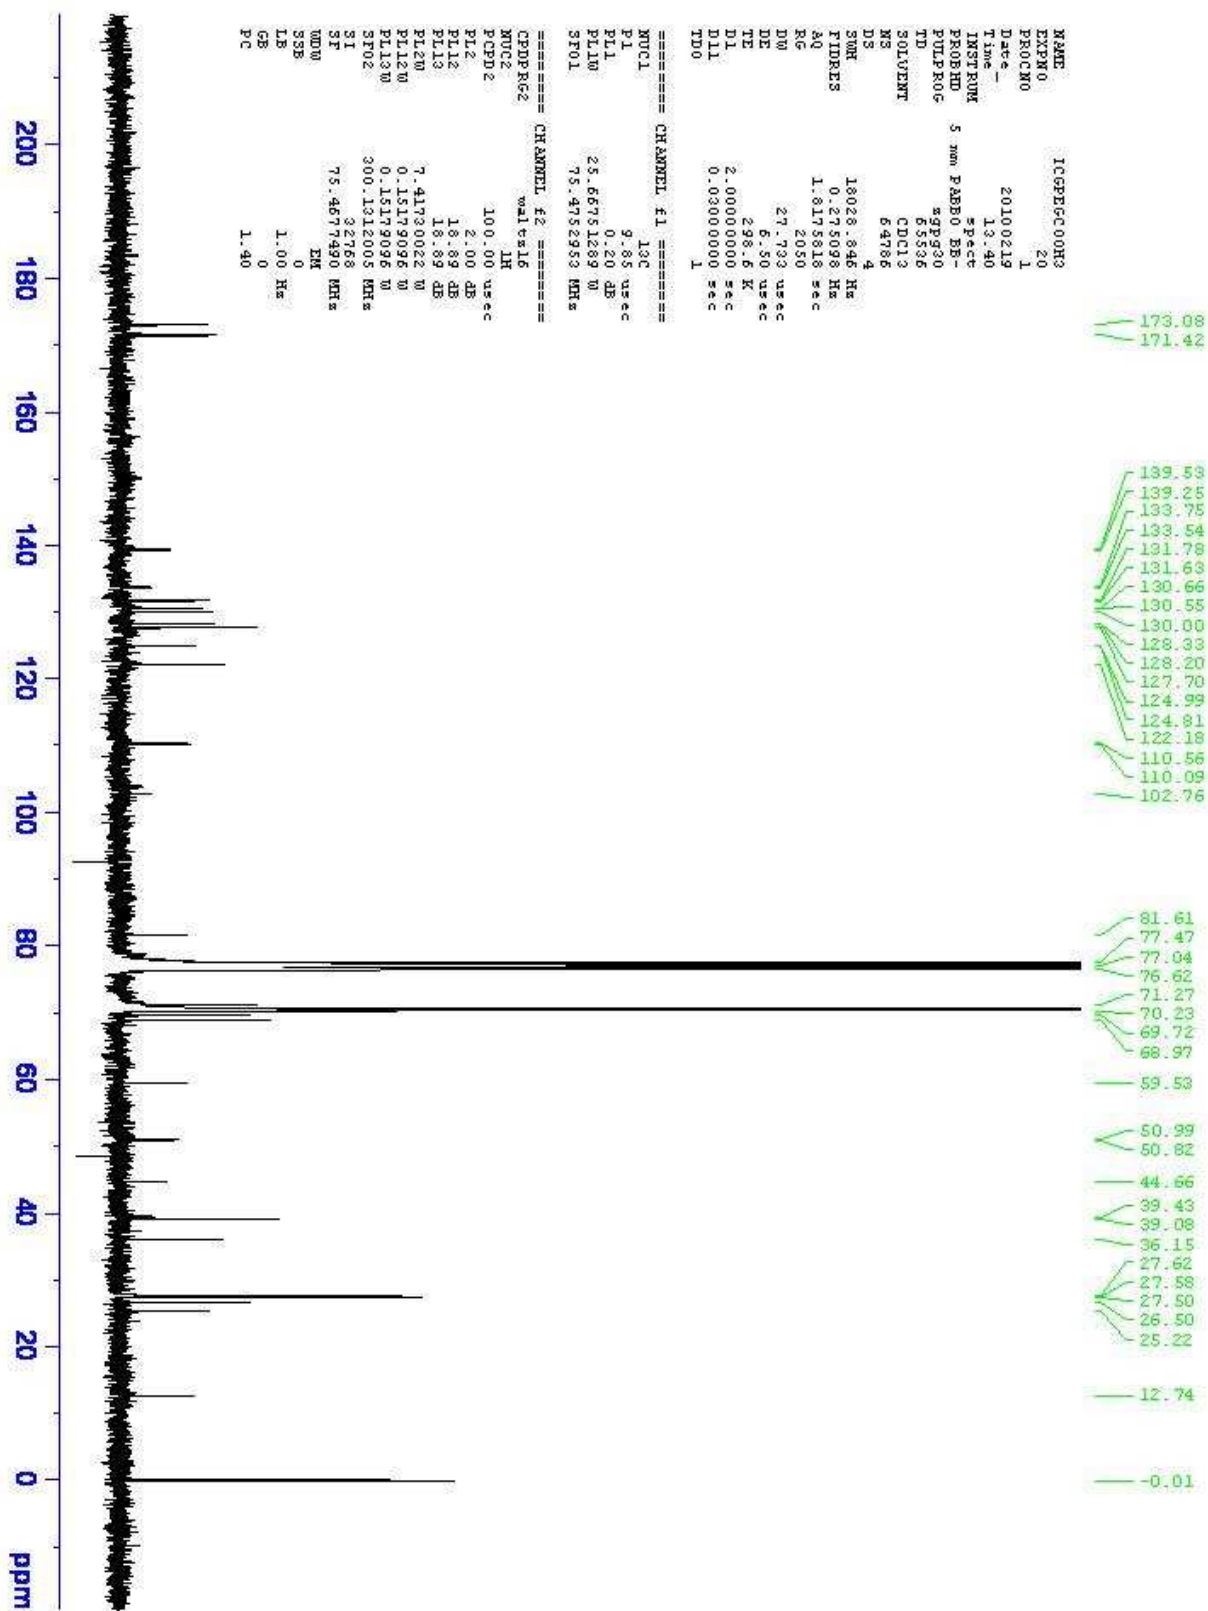

Supplementary Figure 2.  $^{13}\text{C}$  NMR spectrum of PEGylated ICG (4).

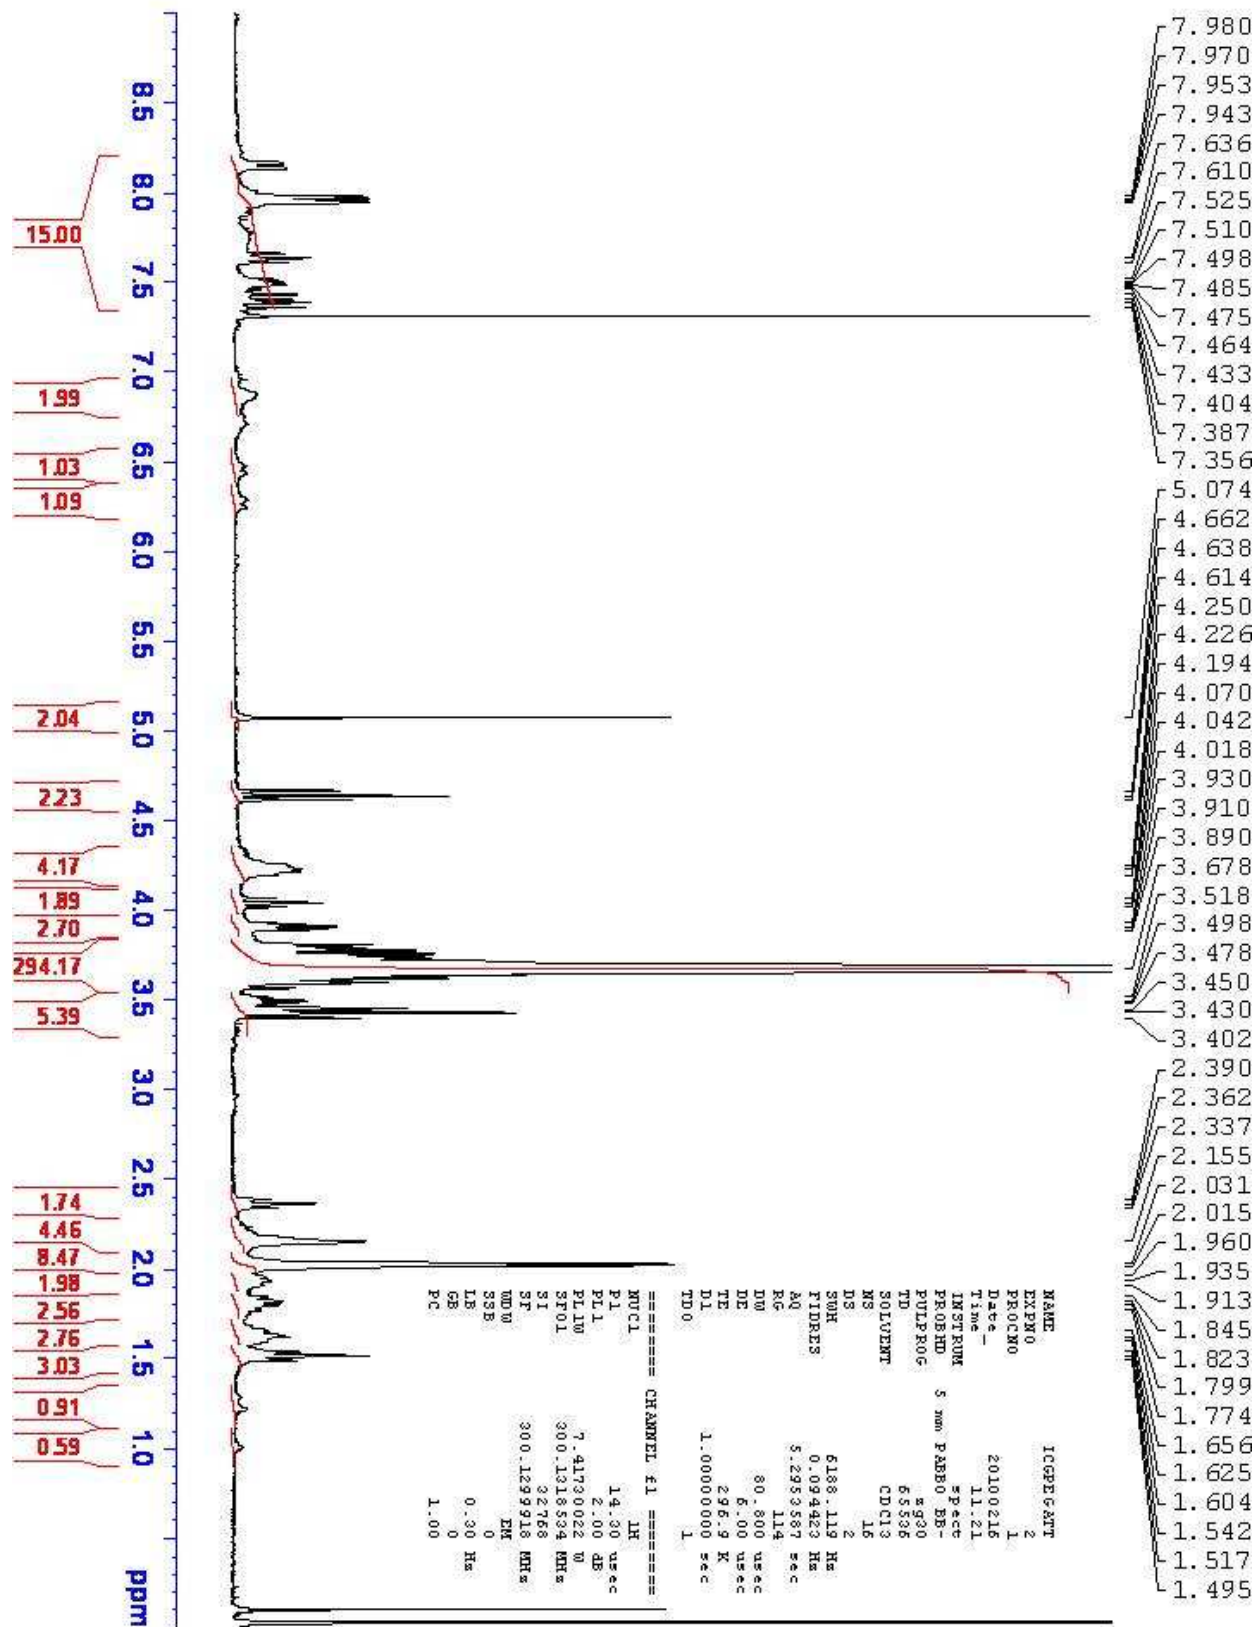

Supplementary Figure 3.  $^1\text{H}$  NMR spectrum of amine-reactive PEGylated ICG (5).



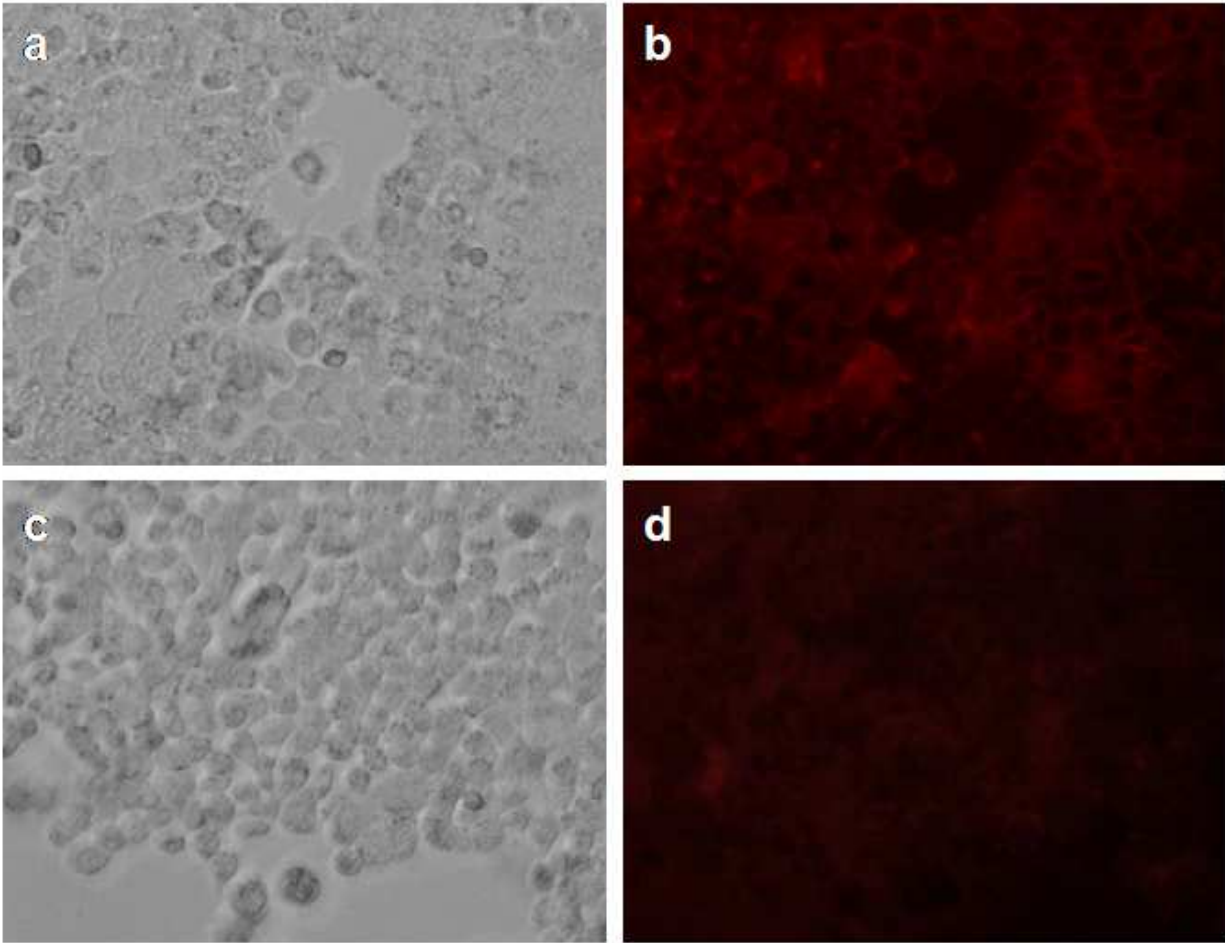

**Supplementary Figure 5.** HER1-positive A431 viable cells incubated with 1  $\mu$ g of test antibody for 2 h at 4 °C. **(a)** DIC and **(b)** fluorescence image of cells stained with **12**. **(c)** DIC and **(d)** fluorescence image of cells stained with **15** (negative control).
